# Supplementary material
Source: Springer Nature journal article supplement (https://www.springermedizin.de/resource/supplementary/12936_2011_2027_MOESM1_ESM.pdf/9543372)

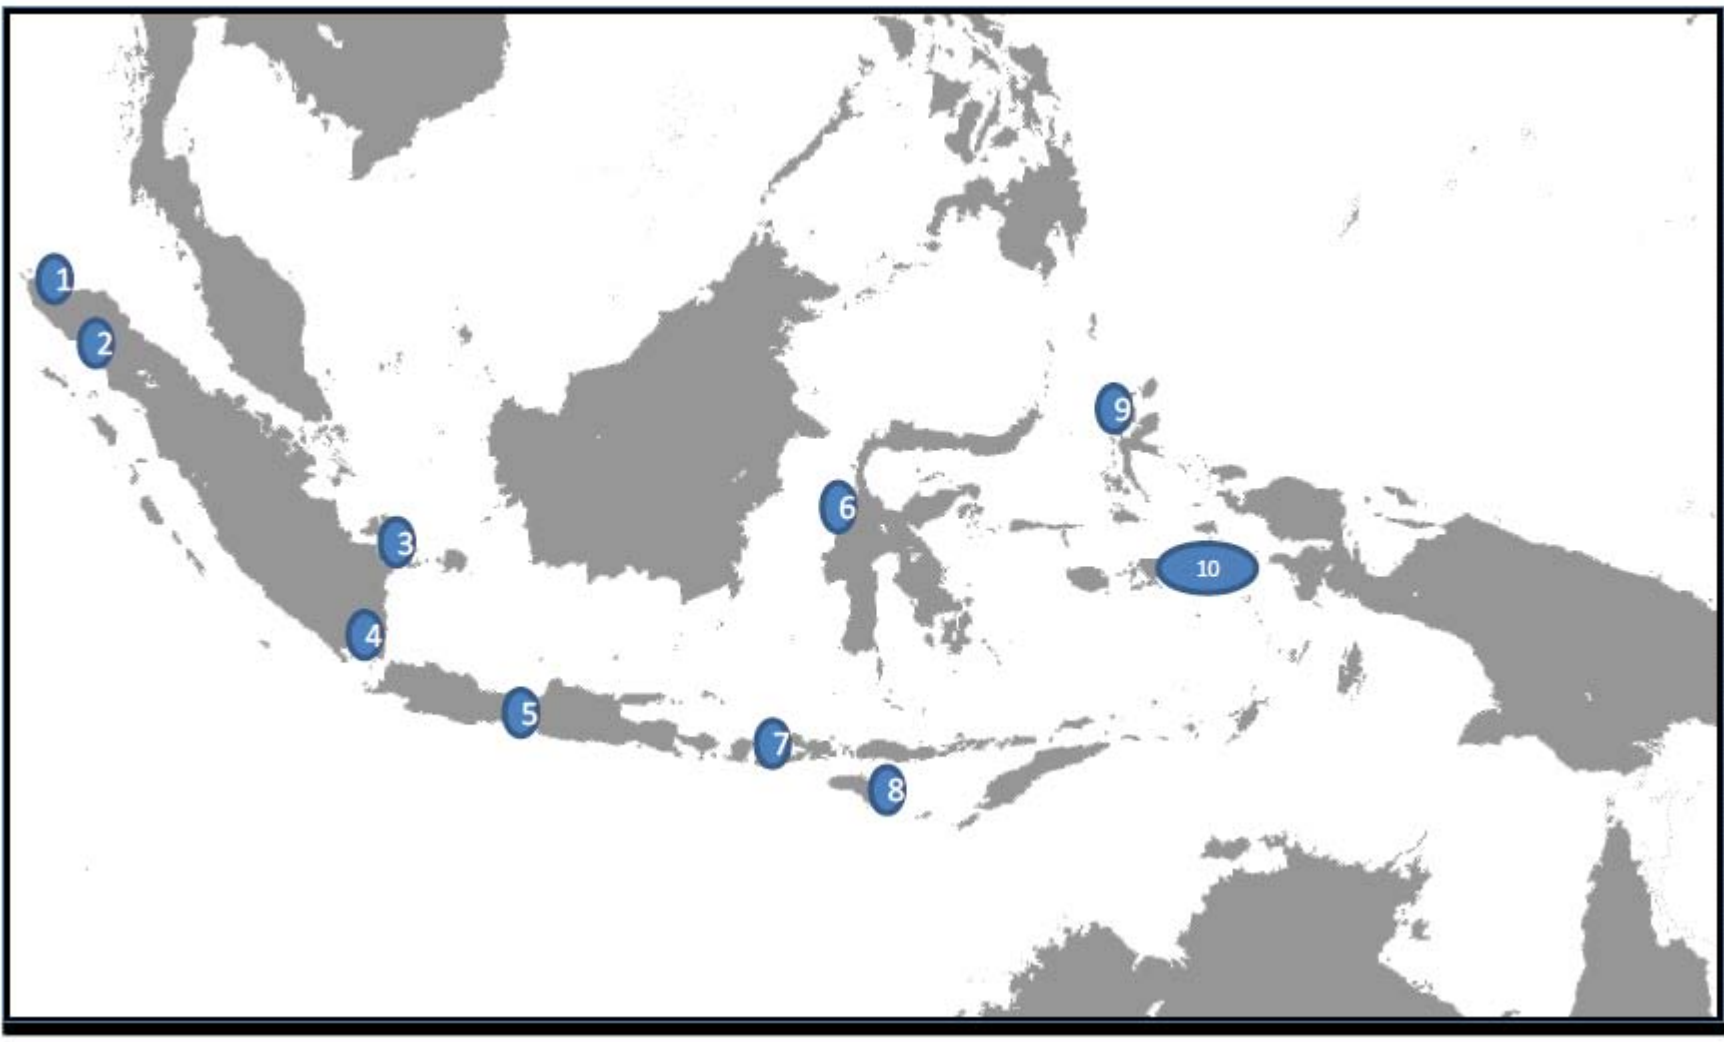

1

2

3

4

5

7

8

6

9

10

Supplement: MOESM1 [file 9543372]
